# Supplementary material for: A canonical correlation analysis based method for contamination event detection in water sources
Source: Royal Society of Chemistry journal article supplement (doi:10.1039/c6em00108d), 2016-01-01
Supplement: c6em00108d1.pdf [file c6em00108d1.pdf]

There are 8 datasets. They are named acry\_11, acry\_12, acry\_13, acry\_14, acry\_21, acry\_22, acry\_23 and acry\_24. The datasets acry\_11, acry\_12, acry\_13 and acry\_14 contain data obtained from experiment 1, and correspond to concentrations of 1.600 mg/l, 3.200 mg/l, 4.800 mg/l and 6.400 mg/l respectively. The datasets acry\_21, acry\_22, acry\_23 and acry\_24 contain data obtained from experiment 2, and correspond to concentrations of 1.600 mg/l, 3.200 mg/l, 4.800 mg/l and 6.400 mg/l respectively. Experiments 1 and 2 are parallel experiments.

There are 8 columns in each dataset. From the 1<sup>st</sup> to the 8<sup>th</sup> column are the data from turbidity, pH, conductivity, temperature, oxidation reduction potential (ORP), NH<sub>3</sub>-N and phosphate respectively. The first 120 rows of data are baseline, and the other rows are contaminated data.
