# Supplementary material for: A canonical correlation analysis based method for contamination event detection in water sources
Source: Royal Society of Chemistry journal article supplement (doi:10.1039/c6em00108d), 2016-01-01
Supplement: c6em00108d2.zip [file c6em00108d2.zip]

## Sheet: Sheet1
0.514	7.638	905.478	13.199	431.795	3.522	117.477	0.188
0.514	7.637	905.326	13.199	432.075	3.519	117.444	0.188
0.513	7.638	910.434	13.186	431.916	3.518	117.577	0.188
0.512	7.637	904.607	13.196	431.541	3.514	117.71	0.188
0.513	7.639	905.435	13.19	431.336	3.514	117.744	0.188
0.514	7.639	905.648	13.191	431.546	3.514	117.577	0.188
0.513	7.639	905.01	13.189	431.506	3.517	117.377	0.188
0.512	7.639	905.714	13.193	431.95	3.521	117.344	0.188
0.512	7.64	905.046	13.196	431.589	3.521	117.544	0.188
0.513	7.64	904.834	13.192	431.941	3.523	117.644	0.188
0.513	7.641	905.687	13.175	431.843	3.522	117.71	0.188
0.512	7.64	905.565	13.181	431.316	3.523	117.544	0.188
0.513	7.642	906.419	13.182	431.551	3.522	117.411	0.188
0.513	7.641	904.908	13.176	431.737	3.524	117.344	0.188
0.512	7.642	904.396	13.181	431.557	3.523	117.444	0.188
0.511	7.641	903.31	13.173	431.994	3.518	117.377	0.188
0.513	7.643	905.367	13.169	431.767	3.516	117.444	0.188
0.514	7.643	904.684	13.161	431.84	3.517	117.377	0.188
0.512	7.644	905.479	13.181	431.848	3.521	117.411	0.188
0.512	7.643	903.662	13.163	431.948	3.52	117.377	0.188
0.512	7.644	904.828	13.165	432.101	3.517	117.344	0.188
0.511	7.644	905.558	13.173	431.643	3.515	117.411	0.188
0.512	7.645	905.211	13.161	432.29	3.514	117.377	0.188
0.512	7.644	904.729	13.168	432.003	3.513	117.411	0.188
0.512	7.645	905.805	13.159	431.694	3.515	117.344	0.188
0.514	7.644	905.023	13.163	432.324	3.517	117.577	0.188
0.513	7.646	904.381	13.158	432.259	3.524	117.544	0.188
0.514	7.645	905.018	13.152	431.266	3.524	117.577	0.188
0.512	7.646	904.92	13.155	431.416	3.526	117.344	0.188
0.512	7.646	904.957	13.148	431.1	3.525	117.411	0.188
0.513	7.647	904.809	13.152	432.426	3.525	117.61	0.188
0.514	7.646	904.186	13.156	431.247	3.523	117.71	0.188
0.513	7.648	904.304	13.148	430.148	3.522	117.71	0.188
0.512	7.647	905.307	13.15	431.461	3.519	117.544	0.188
0.512	7.648	905.206	13.148	431.424	3.518	117.477	0.188
0.511	7.648	904.419	13.14	431.466	3.516	117.511	0.188
0.513	7.649	905.079	13.151	431.679	3.521	117.444	0.188
0.512	7.649	905.348	13.132	431.969	3.519	117.377	0.188
0.513	7.649	901.058	13.143	431.866	3.52	117.244	0.188
0.514	7.65	904.825	13.135	431.427	3.516	117.311	0.188
0.513	7.651	904.582	13.137	431.952	3.517	117.411	0.188
0.513	7.65	904.272	13.147	432.144	3.513	117.544	0.188
0.513	7.651	904.714	13.139	430.712	3.515	117.544	0.188
0.513	7.651	905.174	13.132	431.486	3.514	117.644	0.188
0.512	7.651	905.367	13.134	431.317	3.516	117.511	0.188
0.512	7.652	905.975	13.129	431.372	3.515	117.644	0.188
0.513	7.653	904.696	13.126	431.139	3.52	117.511	0.136
0.513	7.653	904.141	13.125	431.661	3.52	117.61	0.136
0.512	7.653	904.507	13.123	431.301	3.522	117.61	0.136
0.512	7.652	904.72	13.115	431.712	3.524	117.544	0.136
0.513	7.654	905.005	13.121	432.331	3.515	117.544	0.136
0.513	7.654	907.356	13.132	431.18	3.509	117.411	0.136
0.513	7.654	905.5	13.111	430.799	3.508	117.444	0.136
0.513	7.654	904.176	13.124	431.598	3.518	117.311	0.136
0.514	7.654	904.964	13.122	430.946	3.521	117.311	0.136
0.513	7.654	904.844	13.117	430.804	3.521	117.377	0.136
0.513	7.655	904.839	13.115	430.762	3.521	117.511	0.136
0.513	7.656	904.259	13.129	431.108	3.523	117.511	0.136
0.514	7.657	904.306	13.124	431.051	3.518	117.544	0.136
0.514	7.662	907.217	13.12	430.852	3.514	117.477	0.136
0.514	7.638	905.478	13.199	431.795	3.522	117.477	0.188
0.514	7.637	905.326	13.199	432.075	3.519	117.444	0.188
0.513	7.638	910.434	13.186	431.916	3.518	117.577	0.188
0.512	7.637	904.607	13.196	431.541	3.514	117.71	0.188
0.513	7.639	905.435	13.19	431.336	3.514	117.744	0.188
0.514	7.639	905.648	13.191	431.546	3.514	117.577	0.188
0.513	7.639	905.01	13.189	431.506	3.517	117.377	0.188
0.512	7.639	905.714	13.193	431.95	3.521	117.344	0.188
0.512	7.64	905.046	13.196	431.589	3.521	117.544	0.188
0.513	7.64	904.834	13.192	431.941	3.523	117.644	0.188
0.513	7.641	905.687	13.175	431.843	3.522	117.71	0.188
0.512	7.64	905.565	13.181	431.316	3.523	117.544	0.188
0.513	7.642	906.419	13.182	431.551	3.522	117.411	0.188
0.513	7.641	904.908	13.176	431.737	3.524	117.344	0.188
0.512	7.642	904.396	13.181	431.557	3.523	117.444	0.188
0.511	7.641	903.31	13.173	431.994	3.518	117.377	0.188
0.513	7.643	905.367	13.169	431.767	3.516	117.444	0.188
0.514	7.643	904.684	13.161	431.84	3.517	117.377	0.188
0.512	7.644	905.479	13.181	431.848	3.521	117.411	0.188
0.512	7.643	903.662	13.163	431.948	3.52	117.377	0.188
0.512	7.644	904.828	13.165	432.101	3.517	117.344	0.188
0.511	7.644	905.558	13.173	431.643	3.515	117.411	0.188
0.512	7.645	905.211	13.161	432.29	3.514	117.377	0.188
0.512	7.644	904.729	13.168	432.003	3.513	117.411	0.188
0.512	7.645	905.805	13.159	431.694	3.515	117.344	0.188
0.514	7.644	905.023	13.163	432.324	3.517	117.577	0.188
0.513	7.646	904.381	13.158	432.259	3.524	117.544	0.188
0.514	7.645	905.018	13.152	431.266	3.524	117.577	0.188
0.512	7.646	904.92	13.155	431.416	3.526	117.344	0.188
0.512	7.646	904.957	13.148	431.1	3.525	117.411	0.188
0.513	7.647	904.809	13.152	432.426	3.525	117.61	0.188
0.514	7.646	904.186	13.156	431.247	3.523	117.71	0.188
0.513	7.648	904.304	13.148	430.148	3.522	117.71	0.188
0.512	7.647	905.307	13.15	431.461	3.519	117.544	0.188
0.512	7.648	905.206	13.148	431.424	3.518	117.477	0.188
0.511	7.648	904.419	13.14	431.466	3.516	117.511	0.188
0.513	7.649	905.079	13.151	431.679	3.521	117.444	0.188
0.512	7.649	905.348	13.132	431.969	3.519	117.377	0.188
0.513	7.649	901.058	13.143	431.866	3.52	117.244	0.188
0.514	7.65	904.825	13.135	431.427	3.516	117.311	0.188
0.513	7.651	904.582	13.137	431.952	3.517	117.411	0.188
0.513	7.65	904.272	13.147	432.144	3.513	117.544	0.188
0.513	7.651	904.714	13.139	430.712	3.515	117.544	0.188
0.513	7.651	905.174	13.132	431.486	3.514	117.644	0.188
0.512	7.651	905.367	13.134	431.317	3.516	117.511	0.188
0.512	7.652	905.975	13.129	431.372	3.515	117.644	0.188
0.513	7.653	904.696	13.126	431.139	3.52	117.511	0.136
0.513	7.653	904.141	13.125	431.661	3.52	117.61	0.136
0.512	7.653	904.507	13.123	431.301	3.522	117.61	0.136
0.512	7.652	904.72	13.115	431.712	3.524	117.544	0.136
0.513	7.654	905.005	13.121	432.331	3.515	117.544	0.136
0.513	7.654	907.356	13.132	431.18	3.509	117.411	0.136
0.513	7.654	905.5	13.111	430.799	3.508	117.444	0.136
0.513	7.654	904.176	13.124	431.598	3.518	117.311	0.136
0.514	7.654	904.964	13.122	430.946	3.521	117.311	0.136
0.513	7.654	904.844	13.117	430.804	3.521	117.377	0.136
0.513	7.655	904.839	13.115	430.762	3.521	117.511	0.136
0.513	7.656	904.259	13.129	431.108	3.523	117.511	0.136
0.514	7.657	904.306	13.124	431.051	3.518	117.544	0.136
0.514	7.662	907.217	13.12	430.852	3.514	117.477	0.136
0.529	7.661	903.933	13.13	429.493	3.513	117.511	0.136
0.537	7.662	905.521	13.126	429.331	3.52	117.278	0.136
0.539	7.663	905.838	13.122	429.352	3.519	117.311	0.136
0.534	7.663	904.646	13.114	429.199	3.522	117.344	0.136
0.527	7.663	905.493	13.126	429.26	3.517	117.577	0.136
0.524	7.664	905.145	13.113	430.143	3.517	117.511	0.136
0.524	7.663	904.799	13.12	429.074	3.517	117.577	0.136
0.538	7.665	905.712	13.125	429.508	3.515	117.444	0.136
0.532	7.664	905.31	13.123	429.842	3.514	117.444	0.136
0.525	7.665	905.662	13.114	429.635	3.51	117.444	0.136
0.525	7.665	907.307	13.113	429.33	3.516	117.61	0.136
0.528	7.665	906.056	13.116	429.137	3.518	117.61	0.136
0.524	7.665	904.788	13.118	429.366	3.539	117.577	0.136
0.52	7.666	905.124	13.108	429.594	3.549	117.477	0.136
0.521	7.666	903.134	13.115	429.767	3.6	117.644	0.136
0.522	7.667	904.966	13.099	429.722	3.621	117.71	0.136
0.53	7.666	903.8	13.107	429.266	3.707	117.777	0.136
0.542	7.667	903.725	13.105	429.941	3.726	118.043	0.136
0.538	7.667	904.088	13.109	430.013	3.843	118.376	0.136
0.533	7.667	903.252	13.096	429.873	3.868	118.509	0.136
0.53	7.667	901.906	13.09	430.506	4.004	118.576	0.136
0.531	7.668	902.955	13.097	429.964	4.027	118.642	0.136
0.53	7.667	902.622	13.094	429.541	4.156	118.776	0.136
0.547	7.667	902.087	13.089	429.722	4.175	118.909	0.136
0.544	7.668	901.702	13.094	429.702	4.292	119.009	0.136
0.539	7.668	901.332	13.095	429.838	4.306	119.275	0.136
0.54	7.668	899.588	13.093	429.738	4.404	119.275	0.136
0.545	7.669	901.439	13.073	429.329	4.408	119.342	0.136
0.548	7.668	895.235	13.082	430.31	4.487	119.242	0.136
0.544	7.669	899.992	13.078	429.614	4.49	119.508	0.136
0.546	7.669	900.273	13.075	428.99	4.553	119.641	0.136
0.541	7.669	900.477	13.075	429.396	4.556	119.841	0.136
0.561	7.668	900.26	13.079	430.282	4.605	119.774	0.136
0.57	7.669	900.186	13.073	428.971	4.607	119.774	0.136
0.555	7.668	899.521	13.071	429.292	4.644	119.907	0.136
0.544	7.67	899.994	13.064	429.375	4.646	119.874	0.136
0.54	7.669	900.455	13.061	428.834	4.672	119.907	0.136
0.537	7.67	898.589	13.077	429.543	4.674	119.708	0.136
0.537	7.669	900.48	13.061	429.802	4.692	119.608	0.136
0.533	7.67	901.535	13.058	429.408	4.691	119.708	0.136
0.533	7.67	899.45	13.075	429.397	4.702	119.808	0.136
0.531	7.67	899.019	13.063	429.442	4.702	120.14	0.136
0.53	7.671	900.109	13.06	429.49	4.716	120.041	0.136
0.532	7.671	899.404	13.056	429.548	4.719	120.107	0.136
0.529	7.671	900.466	13.053	429.779	4.728	120.007	0.136
0.529	7.671	899.893	13.053	429.203	4.725	120.041	0.136
0.528	7.67	900.282	13.059	430.262	4.726	120.041	0.136
0.527	7.671	899.535	13.061	429.241	4.727	119.941	0.136
0.524	7.671	899.349	13.054	429.715	4.73	119.974	0.136
0.52	7.672	899.876	13.053	429.835	4.734	120.107	0.136
0.521	7.671	899.315	13.043	429.417	4.733	120.107	0.136
0.521	7.672	901.009	13.058	429.206	4.731	120.14	0.136
0.522	7.671	899.839	13.047	429.496	4.733	120.007	0.136
0.52	7.672	899.427	13.054	430.084	4.731	119.941	0.136
0.519	7.672	899.809	13.047	430.336	4.742	119.907	0.136
0.519	7.673	899.91	13.057	429.029	4.745	119.808	0.136
0.518	7.672	899.04	13.035	429.279	4.75	119.808	0.136
0.517	7.673	899.397	13.049	429	4.744	119.741	0.136
0.517	7.673	899.257	13.048	429.405	4.748	119.808	0.136
0.517	7.673	903.476	13.042	429.544	4.748	120.007	0.136
